# Supplementary material
Source: Springer Nature journal article supplement (https://www.springermedizin.de/resource/supplementary/12913_2011_2406_MOESM1_ESM.pdf/9530882)
Supplement: MOESM1 [file 9530882]

**Additional file 1 - Variables of the four models and source of information**

| Type of variable         | source                              | Model 1                                                                                                                                                                                                                                                                                                                                                                                                                                                                                                                                                               | Model 2                                                                                                                                                                                                                                                                                                                                                                                                                                                                                                                                                               | Model 3                                                                                                                                                                                                                                                                                                                                                                                                                                                                                                                                                               | Model 4                                                                                                                                                                                                                                                                                                                                                                                                                                                                                                                                                               |
|--------------------------|-------------------------------------|-----------------------------------------------------------------------------------------------------------------------------------------------------------------------------------------------------------------------------------------------------------------------------------------------------------------------------------------------------------------------------------------------------------------------------------------------------------------------------------------------------------------------------------------------------------------------|-----------------------------------------------------------------------------------------------------------------------------------------------------------------------------------------------------------------------------------------------------------------------------------------------------------------------------------------------------------------------------------------------------------------------------------------------------------------------------------------------------------------------------------------------------------------------|-----------------------------------------------------------------------------------------------------------------------------------------------------------------------------------------------------------------------------------------------------------------------------------------------------------------------------------------------------------------------------------------------------------------------------------------------------------------------------------------------------------------------------------------------------------------------|-----------------------------------------------------------------------------------------------------------------------------------------------------------------------------------------------------------------------------------------------------------------------------------------------------------------------------------------------------------------------------------------------------------------------------------------------------------------------------------------------------------------------------------------------------------------------|
| <b>Socio-demographic</b> | <b>HDR</b>                          | age                                                                                                                                                                                                                                                                                                                                                                                                                                                                                                                                                                   | age                                                                                                                                                                                                                                                                                                                                                                                                                                                                                                                                                                   | age                                                                                                                                                                                                                                                                                                                                                                                                                                                                                                                                                                   | Age                                                                                                                                                                                                                                                                                                                                                                                                                                                                                                                                                                   |
| <b>Socio-demographic</b> | <b>BC</b>                           |                                                                                                                                                                                                                                                                                                                                                                                                                                                                                                                                                                       |                                                                                                                                                                                                                                                                                                                                                                                                                                                                                                                                                                       |                                                                                                                                                                                                                                                                                                                                                                                                                                                                                                                                                                       | Citizenship<br>Marital status<br>Education of mother, father                                                                                                                                                                                                                                                                                                                                                                                                                                                                                                          |
| <b>Clinical</b>          | <b>HDR</b>                          | HIV<br>Diabetes<br>Hypertension<br>Lung<br>Thyroid diseases<br>Genital Herpes<br>Other severe comorbidities of the mother<br>Substance abuse<br>Ante-partum haemorrhage / abruption / Placenta Praevia<br>Eclampsia/Pre-eclamps<br>Cephalopelvic disproportion<br>RH-Isoimmunisation<br>Polyhydramnios<br>Oligohydramnios<br>Premature rupture of the membranes<br>Other problems of the amnios<br>Cord prolapse<br>Abortion threads /assisted fecundation<br>Intrauterine growth retardation<br>Multiple pregnancy<br>Malpresentation<br>Foetal abn affecting mother | HIV<br>Diabetes<br>Hypertension<br>Lung<br>Thyroid diseases<br>Genital Herpes<br>Other severe comorbidities of the mother<br>Substance abuse<br>Ante-partum haemorrhage / abruption / Placenta Praevia<br>Eclampsia/Pre-eclamps<br>Cephalopelvic disproportion<br>RH-Isoimmunisation<br>Polyhydramnios<br>Oligohydramnios<br>Premature rupture of the membranes<br>Other problems of the amnios<br>Cord prolapse<br>Abortion threads /assisted fecundation<br>Intrauterine growth retardation<br>Multiple pregnancy<br>Malpresentation<br>Foetal abn affecting mother | HIV<br>Diabetes<br>Hypertension<br>Lung<br>Thyroid diseases<br>Genital Herpes<br>Other severe comorbidities of the mother<br>Substance abuse<br>Ante-partum haemorrhage / abruption / Placenta Praevia<br>Eclampsia/Pre-eclamps<br>Cephalopelvic disproportion<br>RH-Isoimmunisation<br>Polyhydramnios<br>Oligohydramnios<br>Premature rupture of the membranes<br>Other problems of the amnios<br>Cord prolapse<br>Abortion threads /assisted fecundation<br>Intrauterine growth retardation<br>Multiple pregnancy<br>Malpresentation<br>Foetal abn affecting mother | HIV<br>Diabetes<br>Hypertension<br>Lung<br>Thyroid diseases<br>Genital Herpes<br>Other severe comorbidities of the mother<br>Substance abuse<br>Ante-partum haemorrhage / abruption / Placenta Praevia<br>Eclampsia/Pre-eclamps<br>Cephalopelvic disproportion<br>RH-Isoimmunisation<br>Polyhydramnios<br>Oligohydramnios<br>Premature rupture of the membranes<br>Other problems of the amnios<br>Cord prolapse<br>Abortion threads /assisted fecundation<br>Intrauterine growth retardation<br>Multiple pregnancy<br>Malpresentation<br>Foetal abn affecting mother |
|                          | <b>BC</b>                           |                                                                                                                                                                                                                                                                                                                                                                                                                                                                                                                                                                       |                                                                                                                                                                                                                                                                                                                                                                                                                                                                                                                                                                       | Previous abortion, previous still dead<br>Foetal weight<br>Foetal malformation<br>Gestational age<br>Parity                                                                                                                                                                                                                                                                                                                                                                                                                                                           | Previous abortion, previous still dead<br>Foetal weight<br>Foetal malformation<br>Gestational age<br>Parity                                                                                                                                                                                                                                                                                                                                                                                                                                                           |
|                          |                                     |                                                                                                                                                                                                                                                                                                                                                                                                                                                                                                                                                                       |                                                                                                                                                                                                                                                                                                                                                                                                                                                                                                                                                                       |                                                                                                                                                                                                                                                                                                                                                                                                                                                                                                                                                                       |                                                                                                                                                                                                                                                                                                                                                                                                                                                                                                                                                                       |
| <b>Clinical</b>          | <b>HDR previous hospitalization</b> |                                                                                                                                                                                                                                                                                                                                                                                                                                                                                                                                                                       | HIV<br>Diabetes<br>Hypertension<br>Lung<br>Thyroid diseases<br><br>Other severe comorbidities of the mother                                                                                                                                                                                                                                                                                                                                                                                                                                                           | HIV<br>Diabetes<br>Hypertension<br>Lung<br>Thyroid diseases<br><br>Other severe comorbidities of the mother                                                                                                                                                                                                                                                                                                                                                                                                                                                           | HIV<br>Diabetes<br>Hypertension<br>Lung<br>Thyroid diseases<br><br>Other severe comorbidities of the mother                                                                                                                                                                                                                                                                                                                                                                                                                                                           |
